# Supplementary material for: Physiological responses of maca (Lepidium meyenii Walp.) plants to UV radiation in its high-altitude mountain ecosystem
Source: PubMed Central journal article supplement (PMC7021813; doi:10.1038/s41598-020-59638-4), 2020-02-14
Supplement: 41598_2020_59638_MOESM1_ESM.pdf [file 41598_2020_59638_MOESM1_ESM.pdf]

**Scientific Reports Supplementary Information**

Article title: Physiological Responses of Maca (*Lepidium meyenii* Walp.) Plants to UV Radiation in its High-altitude Mountain Ecosystem

Authors: Huarancca Reyes T, Esparza E, Crestani G, Limonchi F, Cruz R, Salinas N, Scartazza A, Guglielminetti L, Cosio E

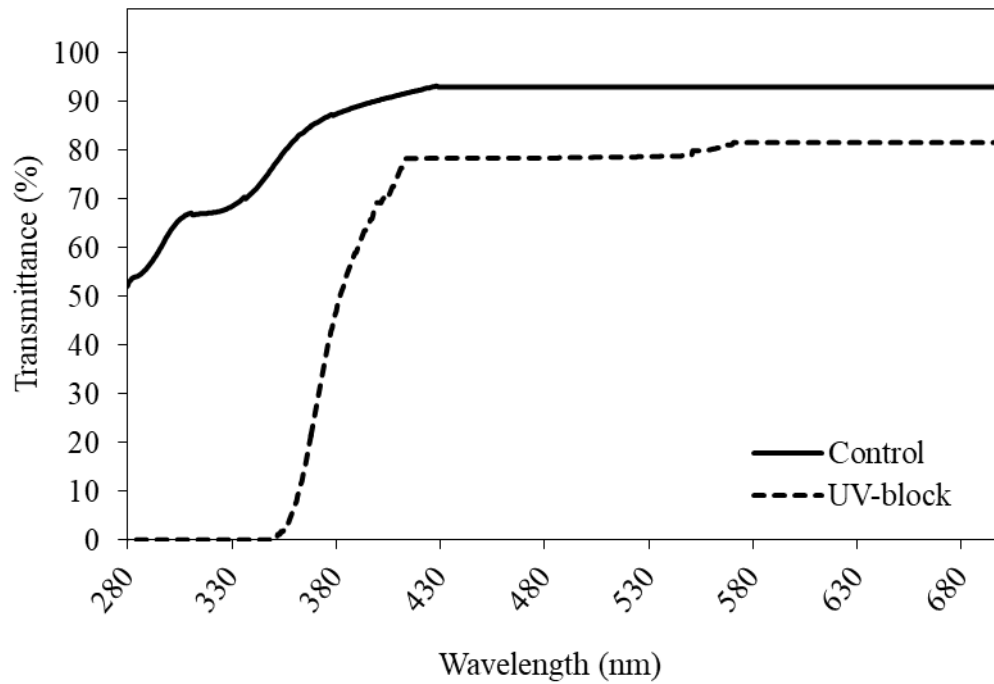

**Supplementary Figure S1.** Transmission spectra of UV-transmitting filter (Control, black line) and UV-blocking filter (UV-block, dashed line) used to cover the tunnels under field conditions.

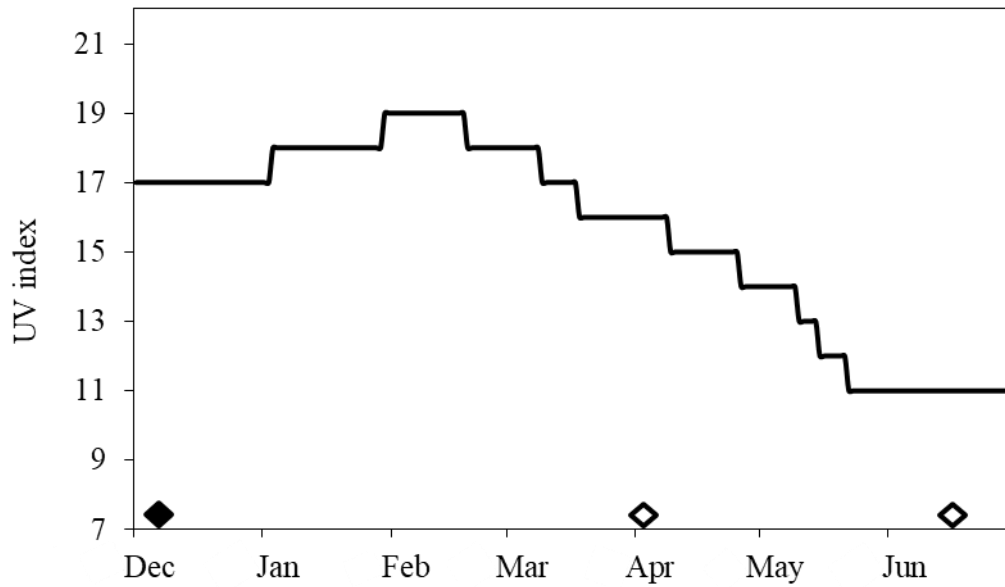

**Supplementary Figure S2.** Maximum daily erythemal UV index at the experimental site (Junín, Peru). Data were collected between December 2016 and June 2017. Sowing (closed diamonds) and sampling dates (open diamonds) are indicated at the bottom of the graph. For details, see Material and Methods.
